# Supplementary material for: Direct Electrochemical Capture and Release of Carbon Dioxide Using an Industrial Organic Pigment: Quinacridone
Source: PubMed Central journal article supplement (PMC4499243; doi:10.1002/anie.201403618), 2014-05-21
Supplement: anie0053-6819-sd1.pdf [file anie0053-6819-sd1.pdf]

Supporting Information

© Wiley-VCH 2014

69451 Weinheim, Germany

**Direct Electrochemical Capture and Release of Carbon Dioxide Using  
an Industrial Organic Pigment: Quinacridone\*\***

*Dogukan Hazar Apaydin,\* Eric Daniel Głowacki, Engelbert Portenkirchner, and  
Niyazi Serdar Sarıçiftçi*

anie\_201403618\_sm\_miscellaneous\_information.pdf

## Supplementary Information File

### Experimental Details:

QNC, obtained from TCI and purified by temperature gradient sublimation, was thermally evaporated onto ITO coated glass slides at a base pressure of a  $10^{-6}$  mbar. Total thickness was 100 nm, verified by profilometry.

The electrochemical cell used for all experiments is shown in Figure S1. Glass/ITO/QNC functioned as the working electrode, a Pt foil was the counter electrode, while an Ag/AgCl wire was used as the quasi-reference electrode. Ferrocene was used as an external standard. The supporting electrolyte was 0.1M TBAPF<sub>6</sub> in anhydrous acetonitrile. All electrochemical measurements were conducted inside a N<sub>2</sub>-filled glove box equipped with inlet for N<sub>2</sub> and CO<sub>2</sub> purging. Reduction of QNC films were conducted in a potential range from -340 to (-1990) mV with a scan rate of 50mV/s. For the electrochemical oxidation leading to the release of captured CO<sub>2</sub>, carbon dioxide rich films were oxidized first and reduced subsequently in order to verify reversibility of the system. FT IR measurements were carried out on a Bruker IFS66S.

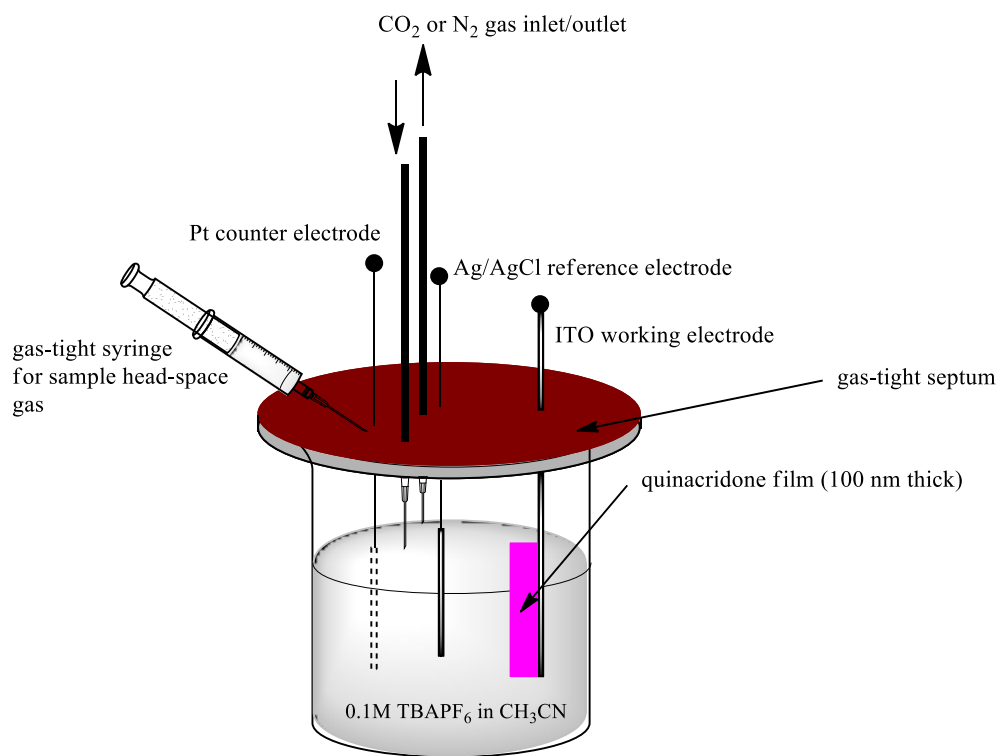

**Figure S1.** Electrochemical gas-tight cell used for all experiments
